# Supplementary material for: Machine Vision Requires Fewer Repeat Measurements than Colorimeters for Precise Seafood Colour Measurement
Source: MDPI journal article supplement (doi:10.3390/foods13071110), 2024-04-04
Supplement: s1 [file s1]

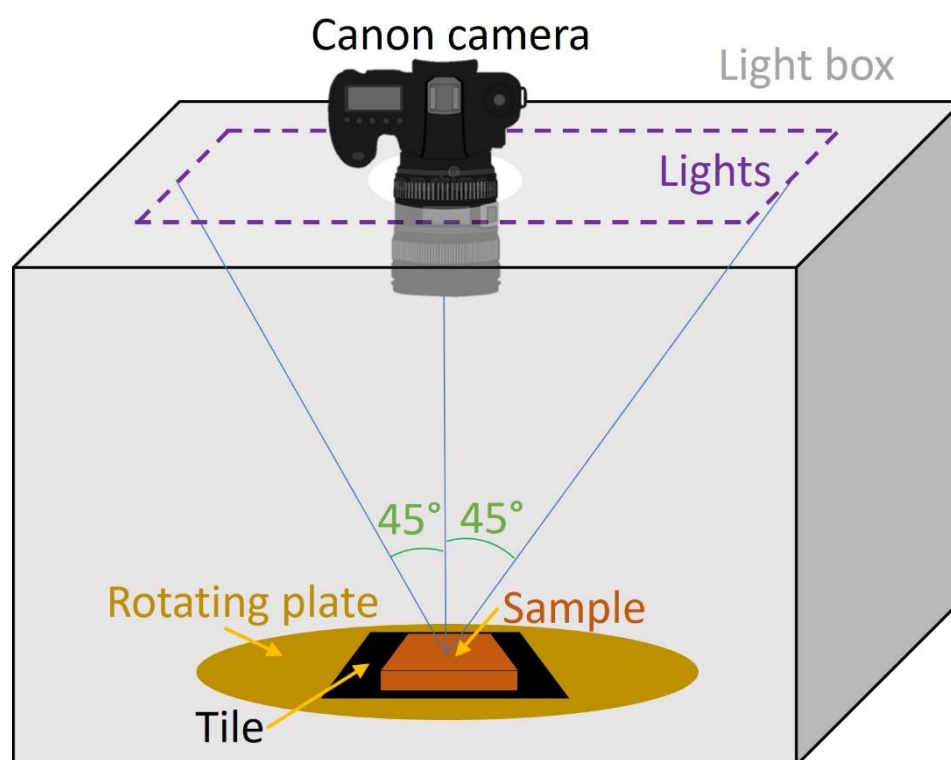

**Figure S1.** Lightbox setup for photography and colorimeter measurement (please refer to online version for Figure with colours).

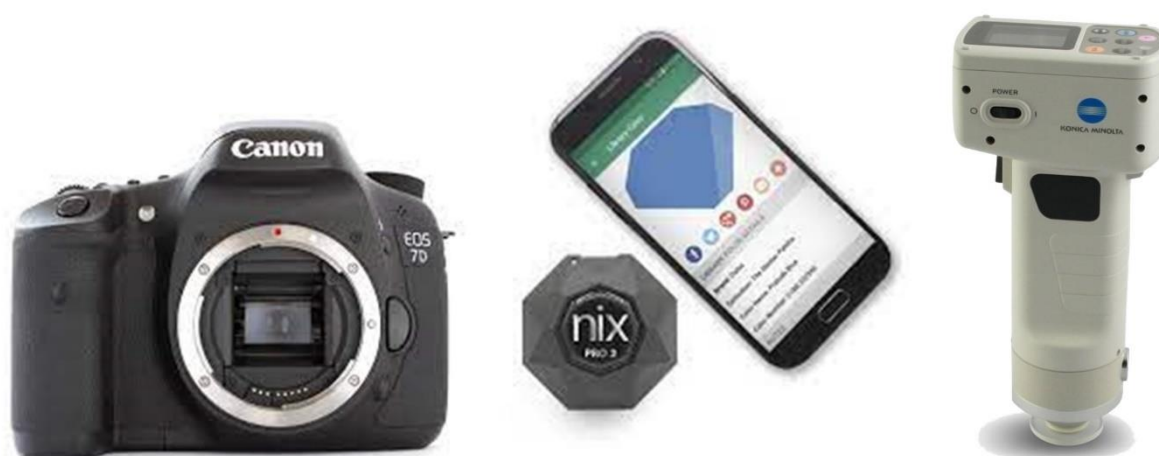

**Figure S2.** Colour measurement devices; Canon EOS 7D DSLR camera (left), Nix and associated smartphone app (middle), and Minolta CR400 (right).

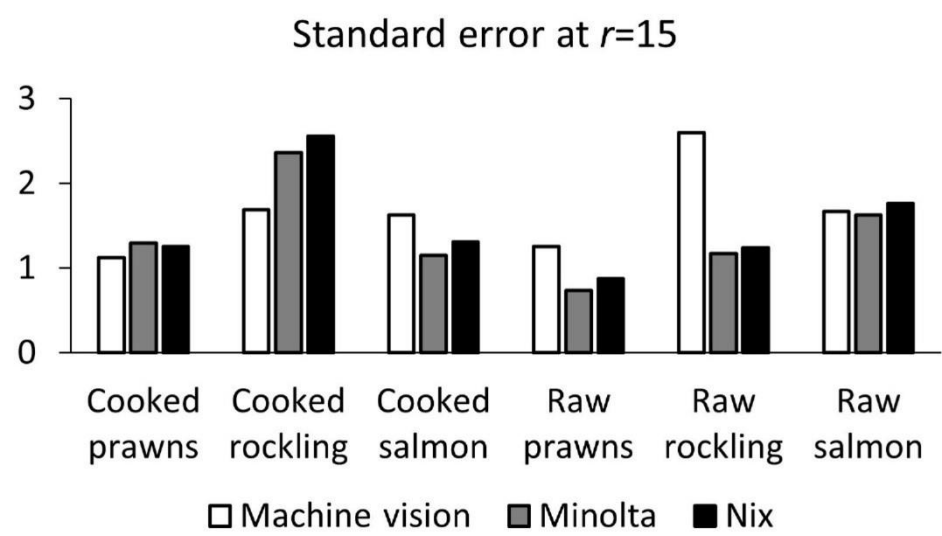

**Figure S3.** Calculated standard error at  $r=15$  using equation 1.
